# Supplementary material for: The role of metal–support interaction for CO-free hydrogen from low temperature ethanol steam reforming on Rh–Fe catalysts
Source: Royal Society of Chemistry journal article supplement (doi:10.1039/c6cp05934a), 2016-11-07
Supplement: c6cp05934a1.pdf [file c6cp05934a1.pdf]

## Supporting Information for

### The role of metal-support interaction for CO-free hydrogen from low temperature ethanol steam reforming on Rh-Fe catalysts

Catherine K.S. Choong,<sup>a,b</sup> Luwei Chen,<sup>a,†</sup> Yonghua Du,<sup>a</sup> Martin Schreyer,<sup>a</sup> S.W. Daniel Ong,<sup>a</sup> Chee Kok Poh,<sup>a</sup> Liang Hong<sup>b</sup> and Armando Borgna<sup>a,‡</sup>

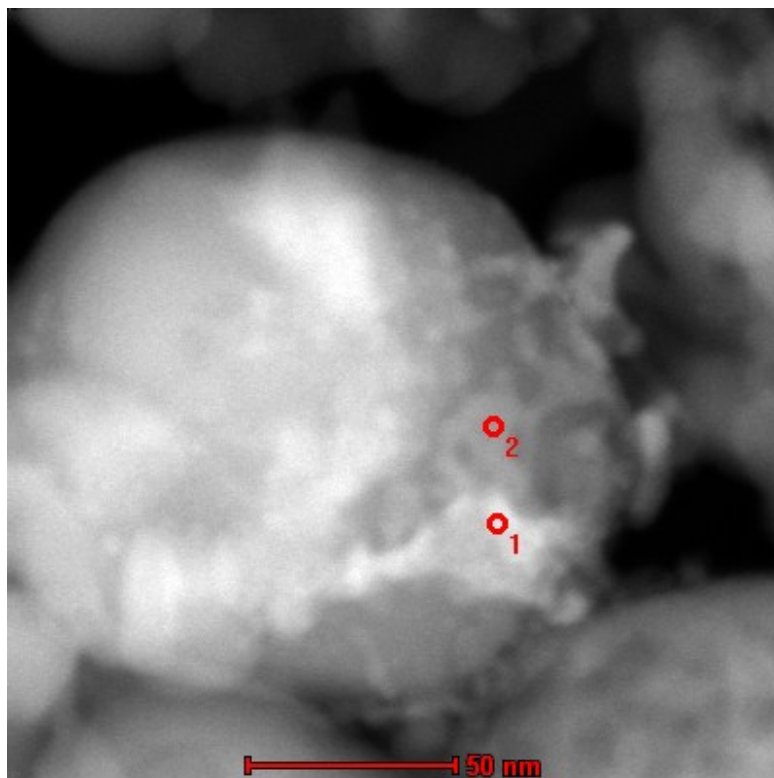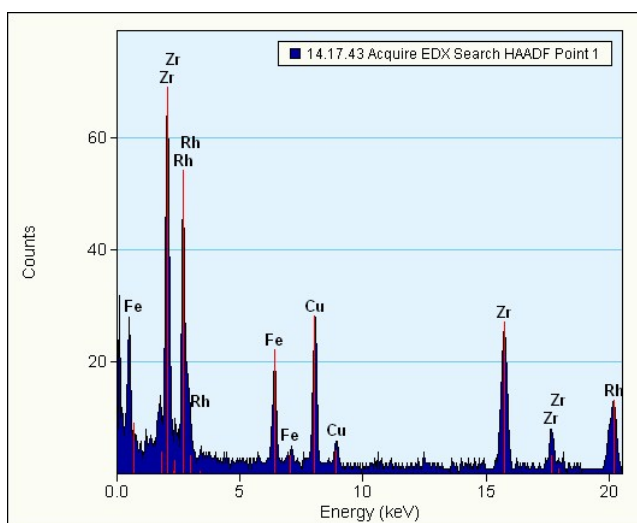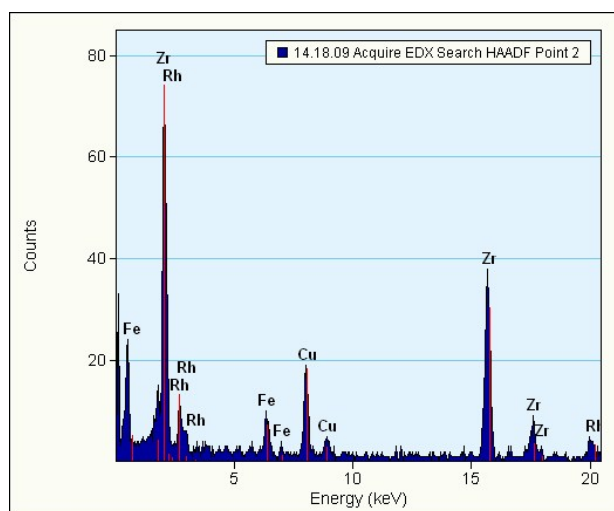

Fig. S1 Dark field image and EDX analysis on reduced Rh-Fe/ZrO<sub>2</sub>.

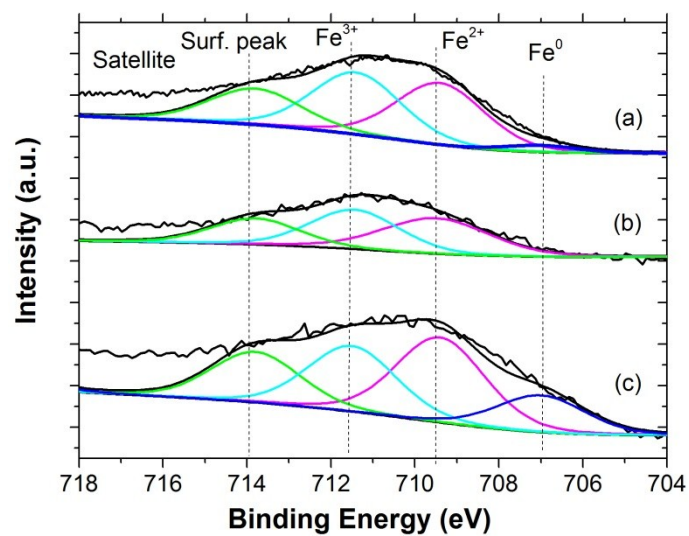

**Figure S2.** Fe 2p XPS spectra of reduced catalysts: (a) Rh-Fe/Ca- $\text{Al}_2\text{O}_3$ ; (b) Rh-Fe/MgO and (c) Rh-Fe/ $\text{ZrO}_2$ .

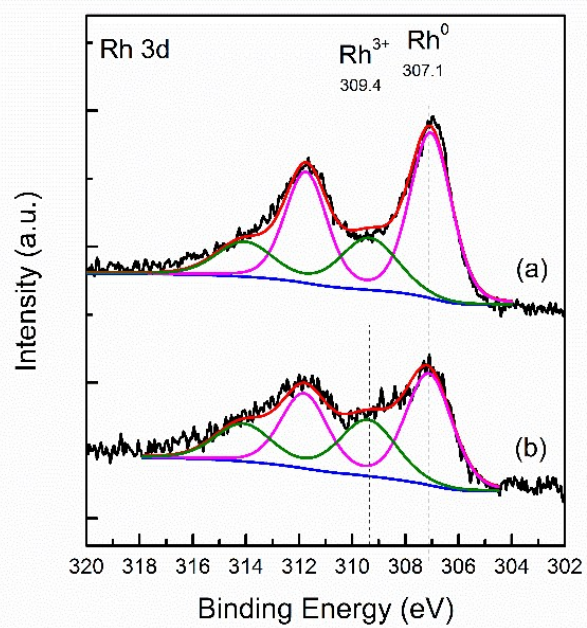

**Figure S3.** Rh 3d XPS spectra of reduced catalysts: (a) Rh/Ca-Al<sub>2</sub>O<sub>3</sub> and (b) Rh-Fe/Ca-Al<sub>2</sub>O<sub>3</sub>.

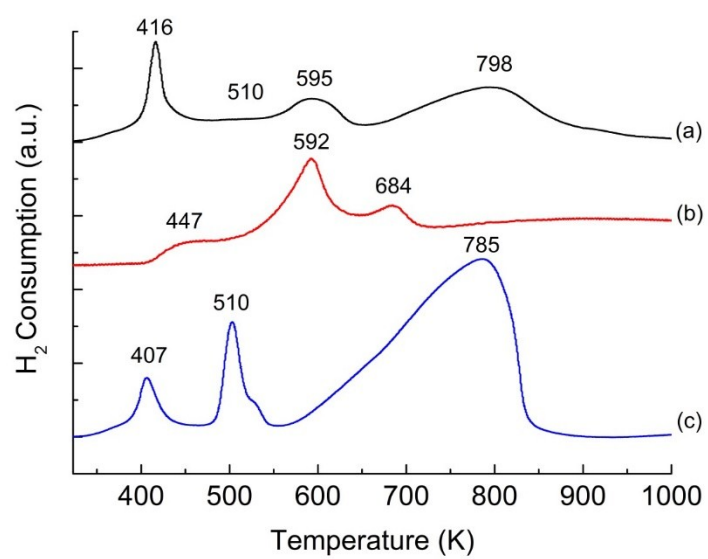

**Figure S4.** TPR profiles of calcined catalysts: (a) Rh-Fe/Ca-Al<sub>2</sub>O<sub>3</sub>, (b) Rh-Fe/MgO and (c) Rh-Fe/ZrO<sub>2</sub>.

**Table S1.** Structural parameters determined from EXAFS analysis of the reduced Rh-Fe/ZrO<sub>2</sub> catalyst.

| Rh-Fe/ZrO <sub>2</sub>          | Fe-Fe1        | Fe-Fe2        | Fe-Rh          |
|---------------------------------|---------------|---------------|----------------|
| N                               | 5.2 ± 0.5     | 2.3 ± 0.3     | 0.8 ± 0.2      |
| R (Å)                           | 2.48 ± 0.01   | 2.87 ± 0.01   | 2.59 ± 0.01    |
| σ <sup>2</sup> (Å) <sup>2</sup> | 0.008 ± 0.001 | 0.009 ± 0.001 | 0.002 ± 0.0005 |
| R-factor                        | 0.031         |               |                |
